# Supplementary material for: Green, facile and fast synthesis of silver nanoparticles by using solution plasma techniques and their antibacterial and anticancer activities
Source: Royal Society of Chemistry journal article supplement (doi:10.1039/d3ra03454b), 2023-01-01
Supplement: d3ra03454b1.pdf [file d3ra03454b1.pdf]

# Green, facile and fast synthesis of silver nanoparticles by using solution plasma technique and their antibacterial and anticancer activities

Nguyen Van Hao, Do Hoang Tung, Vu Xuan Hoa, Nguyen Phu Hung, Ngo Thu Ha, Nguyen Thi Khanh Van, Pham The Tan, and Pham Van Trinh

## Supporting information

Fig. S1 shows the optical pictures of the synthesis process of AgNPs during the solution plasma generation without *P. trimera* extract. As can be seen, the AgNP still may be formed during the solution plasma process. However, the aggregation of AgNPs could be easily observed after 24 hours (Fig. S2 and Fig. S3). This indicated the stability of the AgNP solution without *P. trimera* extract is quite low. Besides, the XRD pattern of prepared AgNP exhibited some typical peaks of Ag<sub>2</sub>O. This demonstrated that the Ag<sub>2</sub>O was formed during the solution plasma process (Fig.S4).

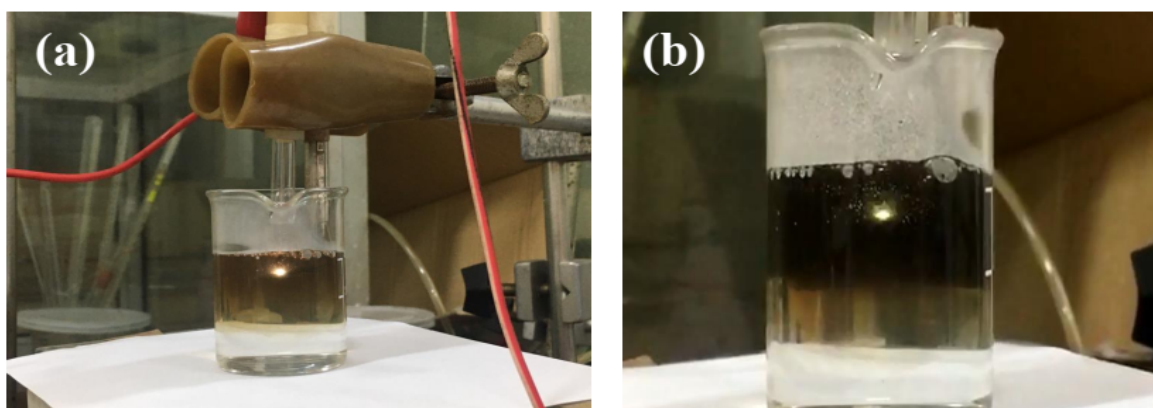

**Fig. S1.** Optical pictures of the synthesis process of AgNPs during the solution plasma generation without *P. trimera* extract for (a) as-started and (b) after 90 seconds

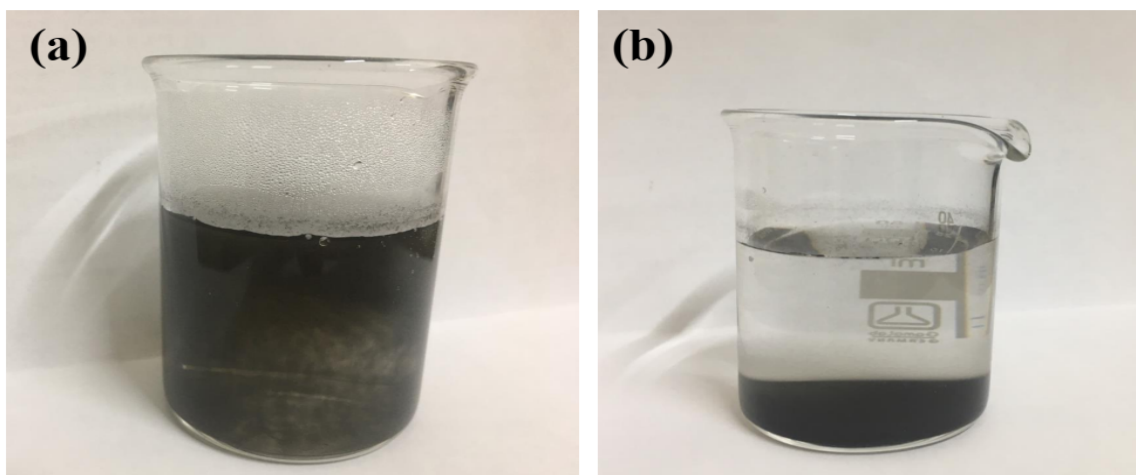

**Fig. S2.** Optical pictures of AgNPs prepared by using the solution plasma process without *P. trimera* extract (a) as-prepared and (b) after 24 hours

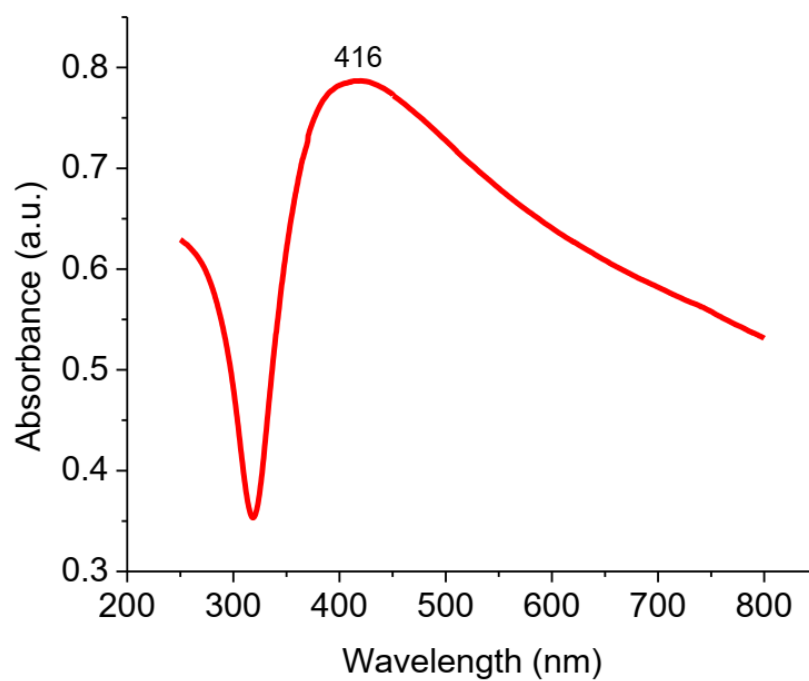

**Fig. S3.** UV-Vis spectra of AgNPs prepared by using the solution plasma process without *P. trimera* extract.

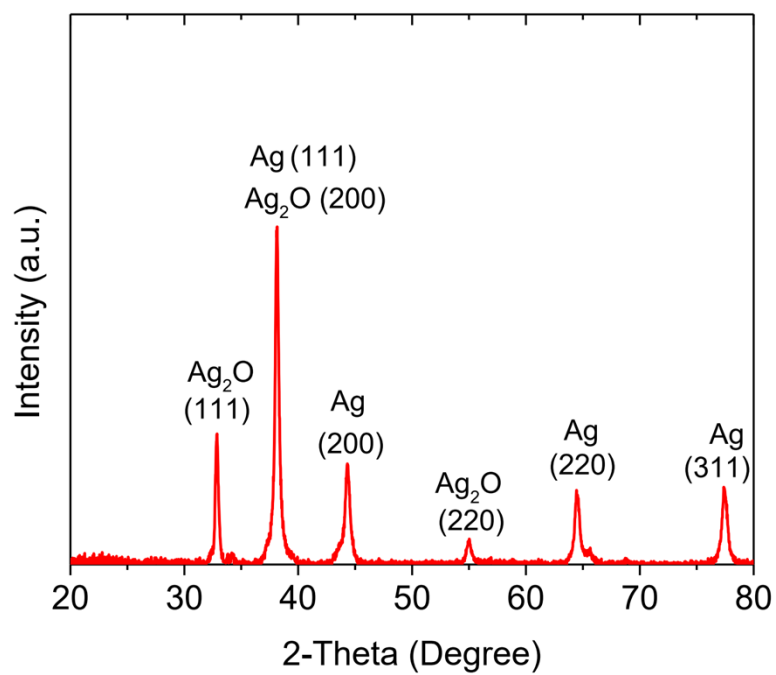

**Fig. S4.** XRD pattern of AgNPs prepared by using the solution plasma process without *P. trimera* extract
